# Supplementary material
Source: HighWire-hosted journal article supplement (http://jmg.bmjjournals.com/highwire/filestream/160944/field_highwire_adjunct_files/1/Supplementary_tables.pdf)
Supplement: Supplementary_tables.pdf [file Supplementary_tables.pdf]

## Supplementary Material

### Complex I deficiency: clinical features, biochemistry and molecular genetics

Elisa Fassone<sup>1</sup> and Shamima Rahman<sup>1,2,3\*</sup>

<sup>1</sup> Mitochondrial Research Group, Clinical and Molecular Genetics Unit, UCL Institute of Child Health,  
London WC1N 1EH, UK

<sup>2</sup> Metabolic Unit, Great Ormond Street Hospital, London WC1N 3JH, UK

<sup>3</sup> MRC Centre for Neuromuscular Diseases, National Hospital for Neurology, Queen Square, London WC1N  
3BG, UK

\* Author for correspondence

Address for correspondence:

Clinical and Molecular Genetics Unit

UCL Institute of Child Health

30 Guilford Street

London WC1N 1EH

UK

Tel: +44(0)207 905 2608

Fax: +44(0)207 404 6191

Email: [shamima.rahman@ucl.ac.uk](mailto:shamima.rahman@ucl.ac.uk)

**Supplementary Table 1**

| Gene (Complex I subunits) | Number of patients | Age at Onset    | Age at Death       | Clinical phenotype                | Lactate (normal <2.0 mM)        | Complex I deficiency (% residual activity compared to mean control) | Gene change(s)                                     | Protein change(s)                             | References                                                |
|---------------------------|--------------------|-----------------|--------------------|-----------------------------------|---------------------------------|---------------------------------------------------------------------|----------------------------------------------------|-----------------------------------------------|-----------------------------------------------------------|
| <b>NDUFV1</b>             | 2                  | 5 months        | 14 and 17 months   | myoclonic epilepsy                | CSF elevated                    | M and Fb low                                                        | cpd het c.175C>T + c.1268C>T                       | R59X + T423M                                  | Schuelke M et al. Nat Genet. 1999 Mar [1]                 |
|                           | 1                  | 6 months        | 10 years           | (macrocytic) leuko-encephalopathy | CSF elevated                    | M and Fb low                                                        | homozygous c.1022 C>T                              | A341V                                         |                                                           |
|                           | 1                  | 1 year          | 3 years            | LS*                               | B 2.6 mM                        | M low (Fb normal)                                                   | cpd het c.640G>A + A>C intron 8 splice site        | E214K + exon 8 skipping -> unstable mRNA      | Bénit P et al. Am J Hum Genet. 2001 Jun [2]               |
|                           | 1                  | 6 months        | 18 months          | LS                                | B 4 mM                          | M low (Fb normal)                                                   | cpd het c.1294G>C + c.989-990del2                  | A432P + premature stop codon -> unstable mRNA |                                                           |
|                           | 1                  | 5 months        | alive at 3 years   | LS                                | B 4.7 mM                        | M low (Fb normal)                                                   | cpd het c.611A>G + c.616T>G                        | Y204C + C206G                                 |                                                           |
|                           | 1                  | First months    | not reported       | leukodystrophy                    | CSF elevated                    | M 36% (Fb normal)                                                   | homozygous c.1022C>T                               | A341V                                         | Bugiani M et al Biochim Biophys Acta. 2004 Dec [3]        |
|                           | 1                  | 7 months        | alive at 7 years   | LS                                | B 3.7- 8.0 mM; CSF 4.8 mM       | M 32%‡ (Fb normal)                                                  | cpd het c.611A>G + c.616T>G                        | Y204C + C206G                                 | Laugel V et al Pediatr Neurol. 2007 Jan [4]               |
|                           | 1                  | 9 months        | alive at 16 months | (cystic) leuko-encephalopathy     | B 1.8 mM                        | M 30%‡; Fb 31%‡                                                     | cpd het c.770G>A + c.632T>C                        | R257Q + A211V                                 | Zafeiriou DI et al. Neuropediatrics. 2008 Jun [5]         |
|                           | 2                  | 6 and 11 months | alive at 32 months | leuko-encephalopathy              | CSF 55 + 44 mg/dL (normal ≤ 20) | M 38%                                                               | homozygous c.1156C>T                               | R386C                                         | Breningstall GN et al. Semin Pediatr Neurol. 2008 Dec [6] |
|                           | 1                  | 2 weeks         | 4 months           | FILA                              | B 21.6 mM; CSF 18.1 mM          | M 11%; Fb 20%                                                       | homozygous c.1129G>A                               | E377K                                         | Calvo SE et al. Nat Genet. 2010 Oct [7]                   |
| 2                         | 3.5 months         | 4.5 months      | LS                 | B 1.7 + 5.2 mM; CSF 2.3 + 2.8 mM  | M low (liver normal)            | homozygous c.1156G>A                                                | R386H                                              | Vilain C et al. Clin Genet. 2011 Jun [8]      |                                                           |
| <b>NDUFV2</b>             | 3                  | 5 days          | 3 months           | HCM                               | B persistently >5 mM            | M 40-50%                                                            | homozygous 4bp deletion of intron 2 IVS2+5+8delGTA | skipping of exon 2                            | Bénit P et al Hum Mutat. 2003 Jun [9]                     |

|                |   |                  |                                                   |                                          |                         |                                                                     |                                                    |                                                                                                         |                                                         |
|----------------|---|------------------|---------------------------------------------------|------------------------------------------|-------------------------|---------------------------------------------------------------------|----------------------------------------------------|---------------------------------------------------------------------------------------------------------|---------------------------------------------------------|
| <b>NDUFV2</b>  | 1 | not reported     | not reported                                      | HCM                                      | not reported            | F 15%‡                                                              | homozygous 4bp deletion of intron 2 IVS2+5+8delGTA | skipping of exon 2                                                                                      | Pagniez-Mammeri H et al. Mol Genet Metab. 2009 Apr [10] |
| <b>NDUFA1</b>  | 2 | 4 and 9 months   | 14 months                                         | LS                                       | B 32 mg/dl (normal <20) | M 20%‡; Fb 17%‡                                                     | hemizygous c.22G>C                                 | G8R                                                                                                     | Fernandez-Moreira D et al Ann Neurol. 2007 Jan [11]     |
|                | 1 | 6 months         | alive at 10 years                                 | cerebellar ataxia and myoclonic epilepsy | B normal                | M 30%‡; Fb 70%‡                                                     | hemizygous c.251G>C                                | R37S                                                                                                    |                                                         |
|                | 1 | 4 years          | alive at 35 years                                 | cerebellar ataxia and neurodegeneration  | B and CSF normal        | M 5–10%                                                             | hemizygous c.94G>C                                 | G32R                                                                                                    | Potluri P et al Mol Genet Metab. 2009 Apr [12]          |
|                | 1 | 5 years          | alive at 30 years                                 | cerebellar ataxia and neurodegeneration  | B 3 mM; CSF 2 mM        | M 5–10%                                                             | hemizygous c.94G>C                                 | G32R                                                                                                    |                                                         |
|                | 1 | 11 months        | alive at 5 years                                  | lactic acidosis (recurrent episodes)     | B 3–4 mM                | M 20%                                                               | hemizygous c.94G>C                                 | G32R                                                                                                    |                                                         |
| <b>NDUFA2</b>  | 1 | 5 days           | 11 months                                         | HCM and LS                               | not reported            | M 20%‡; Fb 36%‡                                                     | homozygous c.208+5G >A                             | impaired exon 2 splicing -> frameshift -> unstable truncated protein -> degraded                        | Hoefs SJ et al Am J Hum Genet. 2008 Jun [14]            |
| <b>NDUFA9</b>  | 1 | soon after birth | 1 month                                           | LS                                       | B 10 mM                 | M 29%; F 11%                                                        | homozygous c.962G>C                                | R321P                                                                                                   | van den Bosch BJ et al J Med Genet. 2011 Nov [15]       |
| <b>NDUFA10</b> | 1 | <10 months       | 23 months                                         | LS* and HCM                              | B 8.6 mM; CSF 4.9 mM    | M 19%; Fb 3% (and Fb CIII 34%)                                      | cpd het c.1A>G + c.425A>G                          | M1? + Q142R                                                                                             | Hoefs SJ et al. Eur J Hum Genet. 2011 Mar [16]          |
|                | 1 | >6 months        | progressive course                                | LS                                       | B and CSF elevated      | M <25%; Fb <25%                                                     | homozygous c.296G>A                                | G99E                                                                                                    | Haack TB et al. J Med Genet. 2012 Feb [17]              |
| <b>NDUFA11</b> | 3 | 10 to 24 hours   | 40 days                                           | FILA and HCM                             | B 10–15 mM              | M 4–27%; Fb 45%                                                     | homozygous IVS1+5 G>A                              | leaky splicing -> activation of cryptic splice site at 19-20bp of exon 1, lacking the 3' 78bp of exon 1 | Berger I et al Ann Neurol. 2008 Mar [18]                |
|                | 3 | 3 to 4 months    | 18 months; 4 years; one patient alive at 6 months | HCM and encephalopathy                   | B 3.2–10 mM             | M 19-39%; Fb 46%                                                    | homozygous IVS1+5 G>A                              |                                                                                                         |                                                         |
| <b>NDUFA12</b> | 1 | 2 years          | alive at 10 years                                 | LS                                       | B 4.9 mM; CSF 2.9 mM    | M 11%; Fb 60%                                                       | homozygous c.178C>T                                | R60X                                                                                                    | Ostergaard E et al. J Med Genet. 2011 Nov [19]          |
| <b>NDUFB3</b>  | 1 | intra-uterine    | 4 months                                          | FILA                                     | B 5.1 mM                | M 6% (M CII+III 17% + CIV 54% - ?PM artefact); Fb 12% (Fb CIII 50%) | homozygous c.64T>C                                 | W22R                                                                                                    | Calvo SE et al. Sci Transl Med. 2012 Jan [20]           |

|               |           |                     |                               |                                   |                                                      |                               |                                                                      |                                                                     |                                                         |
|---------------|-----------|---------------------|-------------------------------|-----------------------------------|------------------------------------------------------|-------------------------------|----------------------------------------------------------------------|---------------------------------------------------------------------|---------------------------------------------------------|
| <b>NDUFB3</b> | 1         | not reported        | not reported                  | unspecified encephalomyopathy     | B elevated                                           | Fb 17%                        | cpd het c.64T>C + c.208G>T                                           | W22R + G70X                                                         | Haack TB et al. J Med Genet. 2012 April [17]            |
| <b>NDUFB9</b> | 1         | <6 months           | progressive course            | unspecified encephalomyopathy     | B elevated                                           | M >50%‡; Fb 21-39%‡           | homozygous c.191T>C                                                  | L64P                                                                | Haack TB et al. J Med Genet. 2012 Feb [21]              |
| <b>NDUFS1</b> | 3         | 2 years; 4 months   | 10 months; 7 months           | leukodystrophy                    | B 4.4 mM; CSF 3.2 mM                                 | M and Fb low                  | cpd het 3bp deletion at c.664-6 + c.755 A>G                          | in-frame codon 222 deletion + D252G                                 | Bénit P et al. Am J Hum Genet. 2001 Jun [2]             |
|               | 2         | 2 and 3 months      | 5 months; 3 months            | LS                                | B and CSF persistently high (5 mM)                   | M and Fb low                  | cpd het c.721 C>T + c.1669 C>T                                       | R241W + R557X -> unstable mRNA                                      |                                                         |
|               | 1         | shortly after birth | not reported                  | LS                                | B 5.3 mM; CSF 4 mM                                   | M (Fb normal)                 | cpd het 2119 A>G + de novo deletion of paternal <i>NDUFS1</i> allele | hemizygous M707V; de novo deletion of paternal <i>NDUFS1</i> allele |                                                         |
|               | 2         | 6 months            | not reported                  | leukodystrophy                    | B elevated                                           | M 45%; Fb 45%                 | homozygous c.1564C>A                                                 | Q522K                                                               | Bugiani M et al Biochim Biophys Acta. 2004 Dec [3]      |
|               | 1         | 8.5 months          | 14 months; 8 months           | LS                                | B 24 mg/dL (normal < 20); CSF 30 mg/dL (normal < 15) | M 25%                         | homozygous c.691C>G                                                  | L231V                                                               | Martín MA et al. Arch Neurol. 2005 Apr [22]             |
|               | 1         | <6 months           | not reported                  | leuko-encephalopathy              | B 1.9 mM; CSF 6.6 mM                                 | Fb 27%                        | cpd het c.683T>C + c.755A>G                                          | V228A + D252G                                                       | Pagniez-Mammeri H et al. Mol Genet Metab. 2009 Apr [10] |
|               | 1         | 8 months            | 12 years                      | (cystic) leukodystrophy           | not reported                                         | M 63%‡; Fb 27%‡               | cpd het c.1669C>T + c.1855G>A                                        | R557X + D619N                                                       | Hoefs SJ et al Mol Genet Metab. 2010 Jul [23]           |
|               | 2         | 4 months            | 8 months; 7 months            | leuko-encephalopathy              | B and CSF elevated                                   | M 10%‡ (M CIII 70%‡); Fb 20%‡ | homozygous c.1222C>T                                                 | R408C                                                               |                                                         |
|               | 1         | 5 months            | 2 years                       | unspecified encephalomyopathy     | not reported                                         | Fb 24%‡                       | cpd het c.631-633del-GAA + c.683T>C                                  | 211delE + V28A                                                      |                                                         |
|               | 2         | 4 and 2 months      | 10.5 months; 10 months        | LL                                | B 3.3 mM; CSF 4.7 mM                                 | M 23%                         | homozygous c.1222C>T                                                 | R408C                                                               | Tuppen HA et al Brain. 2010 Oct [24]                    |
|               | 2         | 11 months           | not reported                  | (macrocytic) leuko-encephalopathy | B 2.4 + 5.1 mM (2.86 mM in CSF)                      | M 45% + 98%‡; Fb 146% + 53%   | homozygous c.1783A>G                                                 | T595A                                                               | Ferreira M et al. Neurogenetics 2011 Feb [25]           |
|               | 1         | 5 months            | 3 years 10 months             | leukodystrophy                    | B persistently elevated                              | Fb ~40%‡                      | cpd het c.497G>A + c.683T>C                                          | G166E + V228A                                                       | Danhauser et al. Mol Genet Metab 2011 Jun [26]          |
|               | 1         | 6 months            | 1 year 7 months               | leukodystrophy                    | B persistently elevated                              | not reported                  | cpd het c.683T>C + c.755A>G                                          | V228A + D252G                                                       |                                                         |
| 1             | <6 months | progressive course  | unspecified encephalomyopathy | B and CSF elevated                | M <50%; Fb <50%                                      | cpd het c.212T>A + c.384T>A   | V71D + C128X                                                         | Haack TB et al. J Med Genet. 2012 Feb [21]                          |                                                         |

|               |   |                  |                             |                                   |                                  |                                             |                                                 |                                   |                                                          |
|---------------|---|------------------|-----------------------------|-----------------------------------|----------------------------------|---------------------------------------------|-------------------------------------------------|-----------------------------------|----------------------------------------------------------|
| <b>NDUFS1</b> | 1 | <6 months        | progressive course          | leukodystrophy                    | B and CSF elevated               | M <50%; Fb <50%                             | cpd het c.1912insA + c.208A>G                   | T638NfsX14 + Y695C                |                                                          |
|               | 1 | >6 months        | progressive course          | leukodystrophy                    | B elevated                       | M <50%; Fb <50%                             | cpd het c.2083T>C + c.2084A>G                   | Y695H + Y695C                     |                                                          |
|               | 1 | >6 months        | not reported                | (macrocytic) leuko-encephalopathy | not reported                     | M 14.5%; Fb 50%                             | cpd het c.1669C>T + c.1783A>G                   | R557X + T595A                     | Invernizzi F et al. Mitochondrion 2012 Mar [27]          |
| <b>NDUFS2</b> | 2 | 6 months         | 24 months                   | HCM and encephalopathy            | B 9.9 + 12 mM; CSF 7.8 mM        | M 20%; Fb 22-31%                            | homozygous c.683G>A                             | R228Q                             |                                                          |
|               | 1 | day 1            | 4 days                      | HCM                               | B 24 mM                          | M 8.4%; Fb 20.5%                            | homozygous c.686C>A                             | P229Q                             | Loeffen J et al Ann Neurol. 2001 Feb [28]                |
|               | 3 | 7 and 10 months  | 18 months; 3 years; 2 years | LS                                | B 4.2, 5.0 + 12.5 mM; CSF 3.3 mM | M 24%; Fb 23%                               | homozygous c.1237T>C                            | S413P                             |                                                          |
|               | 1 | 2 hours          | 3.5 months                  | FILA                              | B 18 mM                          | M 16%                                       | cpd het c.413G>A + c.998G>A                     | R138Q + R333Q                     |                                                          |
|               | 1 | 8 months         | 22 months                   | LS                                | B 11.7 mM; CSF 5.6 mM            | M 20%                                       | cpd het c.353G>A + c.875T>C                     | R118Q + M292T                     |                                                          |
|               | 1 | soon after birth | alive at 9 years            | LL                                | not reported                     | M 27%                                       | cpd het c.875T>C + c.1328T>A                    | M292T + M443K                     | Tuppen HA et al Brain. 2010 Oct [24]                     |
|               | 1 | infancy          | alive at 11 years           | LL                                | B and CSF normal                 | M 13%                                       | cpd het c.442G>A + c.875T>C                     | E148K + M292T                     |                                                          |
|               | 1 | 34 months        | alive at 6 years            | LL                                | B 3.2 mM; CSF 2.7 mM             | not reported                                | cpd het c.866+4A>G + c.875T>C                   | splicing abnormality + M292T      |                                                          |
|               | 1 | <6 months        | progressive course          | HCM                               | B and CSF elevated               | M <25%; Fb <25%                             | cpd het c.329A>T + c.968G>A                     | D110V + R323Q                     | Haack TB et al. J Med Genet. 2012 Feb [21]               |
| <b>NDUFS3</b> | 1 | 9 months         | 13.5 years                  | LS                                | CSF 2.7 mM                       | M 21%; Fb 76%‡                              | cpd het c.434C>T + c.595C>T                     | T145I + R199W                     | Bénit P et al. J Med Genet. 2004 Jan [29]                |
|               | 1 | not reported     | not reported                | unspecified encephalomyopathy     | B elevated                       | M 28%; Fb 36%                               | homozygous c.532C>T                             | R199W                             | Haack TB et al. J Med Genet. 2012 April [17]             |
| <b>NDUFS4</b> | 1 | 8 months         | 16 months                   | LL                                | B and CSF normal                 | M 43%‡ (M CIII 75%‡)                        | homozygous 5-bp duplication c.466_470dupl AAGTC | frameshift resulting in K158fsX31 | van den Heuvel L et al Am J Hum Genet. 1998 Feb [30]     |
|               | 1 | 1 week           | 3 months                    | LS                                | B 5.5 mM; CSF 7.6 mM             | M 22.4%‡; Fb 47%‡ (Fb CIII 87%‡)            | homozygous c.289delG                            | W96X                              | Budde SM et al Biochem Biophys Res Commun. 2000 Aug [31] |
|               | 1 | 7 weeks          | 3 months                    | LS and HCM                        | B 3.0 mM; CSF 3.4 mM             | M 14%‡ (M CIII 57%‡); Fb 60%‡ (Fb CIII 67%) | homozygous c.C316T                              | R106X                             |                                                          |
|               | 1 | 4 months         | 8 months                    | LS                                | B 2.4-3.9 mM; CSF 3.4 mM         | M 10% (M CIII 91%); Fb 30% (Fb CIII 88%)    | homozygous c.C316T                              | R106X                             | Budde SM et al J Inherit Metab Dis 2003 Mar [32]         |
|               | 1 | 4                | not                         | LS                                | not reported                     | not                                         | homozygous                                      | D60fs                             | Lebre AS et al. J                                        |

|               |            |                     |                                   |                          |                                                    |                                            |                                                         |                    |                                                                                                      |
|---------------|------------|---------------------|-----------------------------------|--------------------------|----------------------------------------------------|--------------------------------------------|---------------------------------------------------------|--------------------|------------------------------------------------------------------------------------------------------|
|               | months     | reported            |                                   |                          | reported                                           |                                            |                                                         |                    | Med Genet. 2011 Jan [33]                                                                             |
| 1             | >6 months  | not reported        | LS                                | not reported             | not reported                                       | cpd het                                    | W97fs + S159fs                                          |                    |                                                                                                      |
| 1             | 2 weeks    | 7 months            | LL and HCM                        | B elevated               | M 35%; Fb 16%                                      | homozygous c.44G>A                         | W15X                                                    |                    | Petruzzella V et al Hum Mol Genet. 2001 Mar [34]                                                     |
| 2             | 2 months   | 4 months            | LS                                | B 6–7 mM; CSF 3.9 mM     | M 80%‡                                             | homozygous IVS1nt-1, G>A                   | skipping of exon 2                                      |                    | Bénil P et al Hum Genet. 2003 May [35]                                                               |
| 1             | 4 months   | 6 months            | LS and HCM                        | B and CSF elevated       | M 4% (M CIII 107%); Fb 34% (Fb CIII 87%)           | homozygous c.178_528del; Exon 3-5 deletion | D60_K175del; no protein product?                        |                    | Rötig et al., Biochim Biophys Acta 2004 [36]; Assouline Z et al. Biochim Biophys Acta. 2012 Feb [37] |
| 3             | 3.5 months | 10 months           | LS and HCM in one case; LS in twp | B 1.0-9.5 mM; CSF 4.5 mM | M low                                              | homozygous c.462delA                       | N154fsX33                                               |                    | Anderson SL et al J Inherit Metab Dis. 2008 Dec [38]                                                 |
| 1             | 8 months   | 2.4 years           | LS                                | not reported             | M 54%                                              | cpd het c.115G>A + c.462delA               | N119H + K154fs                                          |                    | Leshinsky-Silver E et al. Mol Genet Metab. 2009 Jul [39]                                             |
| 1             | 3 months   | not reported        | LS                                | B 3.1 mM; CSF 3.6 mM     | M 8% (M CIV 38%); Liver 9% (Liver CIV 54%); Fb 16% | cpd het c.99-1G>A + c.462delA              | S34lfsX4 (skipping of exon 2) + K154NfsX35              |                    | Calvo SE et al. Nat Genet. 2010 Oct [7]                                                              |
| 1             | 4 months   | 2 weeks             | LS                                | B 4.4 mM; CSF 3.9 mM     | M 3% (M CIV 66%); Fb 15%                           | cpd het c.99-1G>A + c.351-2A>G             | S34lfsX4 (exon 2 skipping); transcript unstable         |                    |                                                                                                      |
| 1             | 5 days     | not reported        | encephalopathy                    | B elevated               | M 6%; Fb 47%                                       | homozygous c.99-1G>A                       | S34lfsX4 (exon 2 skipping)                              |                    |                                                                                                      |
| 1             | 3 months   | 6 months            | LL and HCM                        | B and CSF elevated       | M 35%; Fb 69%                                      | homozygous c.291delG                       | W97X                                                    |                    | Assouline Z et al. Biochim Biophys Acta. 2012 Feb [37]                                               |
| 1             | 22 months  | 24 months           | LL                                | not reported             | M 33%; Fb 76%                                      | cpd het c.472dupAAGT C                     | Y160SfsX31                                              |                    |                                                                                                      |
| 1             | 3 months   | 4.5 months          | LS                                | B and CSF elevated       | M low                                              | homozygous c.99-1G>A                       | S34lfsX5 (skipping of exon 2)                           |                    |                                                                                                      |
| 1             | <6 months  | progressive course  | LS and HCM                        | B and CSF elevated       | M <50%                                             | homozygous c.316C>T                        | R106X                                                   |                    | Haack TB et al. J Med Genet. 2012 Feb [21]                                                           |
| <b>NDUFS6</b> | 1          | shortly after birth | 6 days                            | FILA                     | B 6-12 mM                                          | Fb 7%‡                                     | homozygous 4.175-kb deletion encompassing exons 3 and 4 | no protein product | Kirby DM et al J Clin Invest. 2004 Sep [40]                                                          |

**NDUFS4**

**NDUFS6**

|               |   |                     |                            |                               |                           |                           |                                                                                                                                                                                               |                                                                                                  |                                                   |
|---------------|---|---------------------|----------------------------|-------------------------------|---------------------------|---------------------------|-----------------------------------------------------------------------------------------------------------------------------------------------------------------------------------------------|--------------------------------------------------------------------------------------------------|---------------------------------------------------|
| <b>NDUFS6</b> | 2 | shortly after birth | 11 days                    | FILA                          | B 6.5 mM                  | Fb 4%‡                    | homozygous c.186+2T>A                                                                                                                                                                         | frameshift -> premature stop codon predicting truncated protein of 71 instead of 124 amino acids |                                                   |
|               | 2 | day 2               | 8 days                     | FILA                          | B 6.0-11.2 mM; CSF 8.1 mM | M 45%‡                    | homozygous c.344G>A                                                                                                                                                                           | C115Y                                                                                            | Spiegel R et al Eur J Hum Genet. 2009 Sep [41]    |
|               | 2 | 6 days              | 8 days                     | FILA                          | B 16.8 mM; CSF 18.4 mM    | M 56%                     | homozygous c.344G>A                                                                                                                                                                           | C115Y                                                                                            |                                                   |
|               | 1 | <6 months           | progressive course         | unspecified encephalomyopathy | B elevated                | M <50%; Fb <50%           | homozygous c.352C>T                                                                                                                                                                           | Q118X                                                                                            | Haack TB et al. J Med Genet. 2012 Feb [21]        |
| <b>NDUFS7</b> | 2 | 8 and 11 months     | 3 years 11 months; 5 years | LS* ; LS                      | B and CSF normal          | M 23 + 28%‡               | homozygous c.364G>A                                                                                                                                                                           | V122M                                                                                            | Triepels RH et al Ann Neurol. 1999 Jun [42]       |
|               | 1 | 15 months           | not reported               | LS                            | B 4.8 mM; CSF 2.8 mM      | Fb 62%‡                   | homozygous c.434G>A                                                                                                                                                                           | R145H                                                                                            | Lebon S et al. Mol Genet Metab. 2007 Apr [43]     |
|               | 2 | 4 months            | 5 months; 6 months         | LS x2                         | B 15 mM                   | M 38%; Fb 68%             | Homozygous insertion of 122bp cryptic exon (corresponding to first intron of <i>NDUFS7</i> ) between exons 1 and 2; C>G substitution five nucleotides after 122bp insertion (c.17-1167 C > G) | frameshift -> shortened protein                                                                  | Lebon S et al. Mol Genet Metab. 2007 Sep-Oct [44] |
| <b>NDUFS8</b> | 1 | day 1               | 11 weeks                   | LS* and HCM                   | B 3.4 mM; CSF 5.6 mM      | M 39%‡; Fb 69%            | cpd het c.236C>T + c.305 G>A                                                                                                                                                                  | P79L + R102H                                                                                     | Loeffen J et al. Am J Hum Genet. 1998 Dec [45]    |
|               | 1 | 7 years             | alive at 9y                | LS                            | B and CSF normal          | M 31%                     | cpd het c.254C>T + c.413 G>A                                                                                                                                                                  | P85L + R138H                                                                                     | Procaccio V et al. Neurology. 2004 May [46]       |
|               | 1 | 4 weeks             | 3 months                   | FILA                          | B 7.4 mM; CSF 5.5 mM      | M 30%                     | homozygous c.236C>T                                                                                                                                                                           | P79L                                                                                             | Tuppen HA et al Brain. 2010 Oct [24]              |
|               | 1 | 8 months            | 14 months                  | leukodystrophy                | B 3.0 mM; CSF 2.3 mM      | M 8% (+ 52% residual CIV) | homozygous c.460G>A                                                                                                                                                                           | G154S                                                                                            | Calvo SE et al. Nat Genet. 2010 Oct [7]           |
|               | 1 | not reported        | not reported               | HCM and encephalopathy        | not reported              | M 38%; Fb 52%             | cpd het c.229C>T + c.476C>A                                                                                                                                                                   | R77W + A159D                                                                                     | Haack TB et al. J Med Genet. 2012 April [17]      |
|               | 2 | not reported        | not reported               | LS x2                         | B elevated                | M 8%; Fb 54%              | homozygous c.187G>C                                                                                                                                                                           | E63Q                                                                                             |                                                   |

| Gene (Complex assembly factors)           | Number of patients | Age at Onset     | Age at Death         | Clinical phenotype                          | Blood lactate (normal <2.0 mM)                         | CI def in muscles related to ctr mean | Gene change(s)                                                                                                    | Protein change(s)  | References                                        |
|-------------------------------------------|--------------------|------------------|----------------------|---------------------------------------------|--------------------------------------------------------|---------------------------------------|-------------------------------------------------------------------------------------------------------------------|--------------------|---------------------------------------------------|
| <b>NDUFAF1; CIA30</b>                     | 1                  | 11 months        | alive at 20y         | HCM and later multisystem disease           | B 5–10 mM in first few years of life; later 2.5–3.5 mM | Fb 36%                                | cpd het c.1001A>C + c.1140A>G                                                                                     | T207P + K253R      | Dunning CJ et al. EMBO J. 2007 Jul [47]           |
|                                           | 1                  | 6 months         | 6.5 months           | HCM                                         | B 9-18 mM                                              | M 25%; Fb 60%                         | cpd het c.631C>T + c.733G>A;                                                                                      | R211C + G245R      | Fassone E et al. J Med Genet. 2011 Oct [48]       |
| <b>NDUFAF2; NDUFA12L; B17.2L; Mimitin</b> | 1                  | 12 months        | 13 years 7 months    | LL                                          | B normal; CSF 4.2 mM                                   | M 38%; Fb <20%                        | hemizygous c.182C>T                                                                                               | R45X               | Ogilvie I et al. J Clin Invest. 2005 Oct [49]     |
|                                           | 1                  | 20 months        | 2 years              | LL                                          | B and CSF repeatedly normal                            | M 36%                                 | homozygous c.1A>T                                                                                                 | M1L                | Barghuti F et al. Mol Genet Metab. 2008 May [50]  |
|                                           | 1                  | 8 months         | 18 months            | LS                                          | B normal; CSF 2.6 mM                                   | M 24% (53% in fb)                     | homozygous c.1A>T                                                                                                 | M1L                |                                                   |
|                                           | 1                  | 3 months         | 1 year               | LS                                          | B 3-5 mM                                               | Fb 21%‡                               | homozygous c.114C>G                                                                                               | Y38X               | Hoefs SJ et al. Hum Mutat. 2009 Jul [51]          |
|                                           | 1                  | intra-uterine    | 14 months            | LL                                          | B 2.5–3.4 mM                                           | Fb 45%‡                               | homozygous ~450kb deletion on chromosome 5, encompassing 3 genes: <i>ELOVL7</i> , <i>ERCC8</i> and <i>NDUFAF2</i> | no protein product | Janssen RJ et al. Hum Mol Genet. 2009 Sep 15 [52] |
|                                           | 1                  | soon after birth | 27 months            | LS*                                         | B initially 4.2 mM, subsequently normal; CSF normal    | M 12%‡; Fb 40%                        | homozygous c.9G >A                                                                                                | W3X                | Herzer M et al. Neuropediatrics. 2010 Feb [53]    |
|                                           | 2                  | 6 and 3 months   | 17 months; 14 months | LS*; LS                                     | CSF 3.2 mM                                             | Fb 26%                                | homozygous c.103delA                                                                                              | I35SfsX17          | Calvo SE et al. Nat Genet. 2010 Oct [7]           |
|                                           | 1                  | 4 months         | 15 months            | LS                                          | CSF 2.4 mM                                             | Fb 32%                                | homozygous c.221G>A                                                                                               | W74X               |                                                   |
| <b>NDUFAF3; C3ORF60</b>                   | 3                  | 1 to 3 days      | 3 months             | FILA x3                                     | B persistently markedly elevated (peak 27 mM)          | M 32-40%; Fb 39%                      | homozygous c.229 G>C                                                                                              | G77R               | Saada A et al. Am J Hum Genet. 2009 Jun [54]      |
|                                           | 1                  | 3 weeks          | 4 months             | FILA                                        | B 5.4 mM; CSF 6 mM                                     | M 26%; Fb 18%                         | homozygous c.365 G>C                                                                                              | R122P              |                                                   |
|                                           | 1                  | 3 months         | 6 months             | encephalopathy including myoclonic epilepsy | B peak 27 mM                                           | M nd; Fb 33%                          | cpd het c.2T>C + c.365G>C                                                                                         | M1T + R122P        |                                                   |

|                                          |   |                  |                                                                   |                                        |                            |                                                                           |                                                                                                      |                                                      |                                                                                      |
|------------------------------------------|---|------------------|-------------------------------------------------------------------|----------------------------------------|----------------------------|---------------------------------------------------------------------------|------------------------------------------------------------------------------------------------------|------------------------------------------------------|--------------------------------------------------------------------------------------|
| <b>NDUFAF4;<br/>C6ORF66;<br/>HRPAP20</b> | 9 | soon after birth | 3 died at 2-5 days; oldest survivor was 7 years at time of report | FILA x3; encephalopathy in other cases | B 38 mM                    | M 5.5-17%; Fb 32%-67%                                                     | homozygous c.194T>C                                                                                  | L65P                                                 | Saada A et al. Am J Hum Genet. 2008 Jan [55]                                         |
|                                          | 1 | <6 months        | progressive course                                                | leukodystrophy                         | B and CSF elevated         | M <25%; Fb <25%                                                           | homozygous c.23G>A                                                                                   | G8D                                                  | Haack TB et al. J Med Genet. 2012 Feb [21]                                           |
| <b>C8ORF38</b>                           | 2 | 7 and 10 months  | 34 months; alive at 22 months                                     | LS x2                                  | B persistently elevated    | M 36%; Fb 14%                                                             | homozygous c.296A>G                                                                                  | Q99R; possible splicing defect (at 3' end of exon 2) | Pagliarini DJ et al. Cell. 2008 Jul [56]; McKenzie M et al. J Mol Biol 2011 Dec [57] |
| <b>C20ORF7</b>                           | 1 | intra-uterine    | 7 days                                                            | FILA                                   | B 3.1-16.5 mM; CSF 20.1 mM | M 10-20%; Fb 5<25%                                                        | homozygous c.719T>C                                                                                  | L229P                                                | Sugiana C et al. Am J Hum Genet. 2008 Oct [58]                                       |
|                                          | 3 | 3 years          | 36 years; two alive at 23 and 29 years                            | LS x3                                  | CSF 5 mM                   | M 36-48%; Fb 6<33%                                                        | homozygous c.477A>C                                                                                  | L159F                                                | Gerards M et al. J Med Genet. 2010 Aug [59]                                          |
|                                          | 5 | 1 year           | 5.9 years; four cases alive at 2.5, 4.5, 6 and 7 years            | LS x5                                  | B 3.0-3.6 mM; CSF 2.7 mM   | M ~20% (+ ~35% residual CIV)                                              | homozygous c.749G>T                                                                                  | G250V                                                | Saada A et al. J Inherit Metab Dis. 2012 Jan [60]                                    |
| <b>FOXRED1</b>                           | 1 | day 1            | alive at 22 years                                                 | LS                                     | B 4-15 mM; CSF 3.2 mM      | M 9% (+ 76% residual CIV); Fb 9% (+ 34% residual CII + 31% residual CIII) | cpd het c.694C>T + c.1289A>G                                                                         | Q232X + N430S                                        | Calvo SE et al. Nat Genet. 2010 Oct [7]                                              |
|                                          | 1 | soon after birth | alive at 10 years                                                 | unspecified encephalomyopathy          | B 6.8 mM; CSF 4.3 mM       | M 7%; Fb 70%                                                              | homozygous c.1054C>T                                                                                 | R352W                                                | Fassone E et al. Hum Mol Genet. 2010 Dec [61]                                        |
|                                          | 1 | <6 months        | progressive course                                                | unspecified encephalomyopathy          | B normal                   | M <25%; Fb <25%                                                           | cpd het c.406C>T + c.615insAGTG                                                                      | R316W + A206SfsX15                                   | Haack TB et al. J Med Genet. 2012 Feb [21]                                           |
| <b>NUBPL;<br/>hIND1</b>                  | 1 | 2 years          | alive at 8y                                                       | leukodystrophy                         | B normal; CSF 5.2 + 2.7 mM | M 37%; Fb 19%                                                             | cpd het c.166G>A + c.815-27T>C on one allele and a deletion that spans exons 1-4 on the other allele | G56R + exon 10 skipping                              | Calvo SE et al. Nat Genet. 2010 Oct [7]                                              |
| <b>ACAD9</b>                             | 1 | 1 month          | alive at 18 years                                                 | HCM and exercise intolerance           | B 3.1-7.6 mM; CSF 3.6 mM   | M 31%±; Fb 30%                                                            | homozygous c.1553 G>A                                                                                | R518H                                                | Nouws J et al. Cell Metab. 2010 Sep [62]                                             |
|                                          | 1 | 4 months         | 6 months                                                          | HCM and encephalopathy                 | not reported               | M 34%; Fb 32%                                                             | cpd het c.187G>T + c.1237G>A                                                                         | stop codon after 62 amino acids + E413K              |                                                                                      |

|              |   |              |                              |                                                      |              |                                               |                                                                                           |               |                                                                                              |
|--------------|---|--------------|------------------------------|------------------------------------------------------|--------------|-----------------------------------------------|-------------------------------------------------------------------------------------------|---------------|----------------------------------------------------------------------------------------------|
| <b>ACAD9</b> | 2 | 24 hours     | 46 days; alive at 5 years    | HCM and encephalopathy; HCM and exercise intolerance | B 4 mM       | M 39% (+ slightly reduced CV); Fb 9% (52% CV) | cpd het c.130T>A + c.797G>A                                                               | F44I + R266Q  | Haack TB et al. Nat Genet. 2010 Dec [63]; Haack TB et al. J Med Genet. 2012 Feb [21]         |
|              | 1 | <6 months    | 12 years                     | HCM and encephalopathy                               | B elevated   | Fb 13%                                        | cpd het c.797G>A + c.1249C>T (identical to a mutation in the homologous region of ACADVL) | R266Q + R417C |                                                                                              |
|              | 1 | <6 months    | 2 years                      | HCM and encephalopathy                               | B elevated   | Fb 26%                                        | cpd het c.976G>C (found in 3% of controls) + c.1594C>T                                    | A326P + R532W |                                                                                              |
|              | 3 | >4 years     | alive at 15, 22 and 24 years | exercise intolerance                                 | B 2.7-6.5 mM | M low; Fb 38-50%                              | homozygous c.1594C>T                                                                      | R532W         | Gerards M et al. Brain. 2011 Jan [64]; Scholte HR et al. Biochim Biophys Acta. 1995 May [65] |
|              | 1 | not reported | not reported                 | exercise intolerance                                 | B 7.8 mM     | M low                                         | cpd het c.380G4A ( <i>in cis</i> + c.379A4C) + c.1405C4T                                  | R127Q + R469W |                                                                                              |
|              | 1 | <1 month     | not reported                 | HCM                                                  | B elevated   | Fb low                                        | cpd het c.260T>A + c.976G>C                                                               | I87N + A326P  | Calvo SE et al. Sci Transl Med. 2012 Jan [20]                                                |
|              | 3 | not reported | not reported                 | exercise intolerance                                 | B elevated   | M 3%                                          | homozygous c.1594C>T                                                                      | R532W         | Haack TB et al. J Med Genet. 2012 April [17]                                                 |

**Key:** ‡ = % of lowest control; B = blood; cpd het = compound heterozygous; CSF = cerebrospinal fluid; Fb = fibroblast; FILA = fatal infantile lactic acidosis; LL = Leigh-like syndrome; LS = Leigh syndrome; LS\* = neuropathologically proven LS; M = muscle; nd = not determined; PM = post mortem

## REFERENCES

- (1) Schuelke M, Smeitink J, Mariman E, Loeffen J, Plecko B, Trijbels F, Stockler-Ipsiroglu S, van den Heuvel L. Mutant NDUFV1 subunit of mitochondrial complex I causes leukodystrophy and myoclonic epilepsy. Nat Genet 1999 Mar;**21**(3):260-1.
- (2) Benit P, Chretien D, Kadhon N, De Lonlay-Debeney P, Cormier-Daire V, Cabral A, Peudener S, Rustin P, Munnich A, Rotig A. Large-scale deletion and point mutations of the nuclear NDUFV1 and NDUFS1 genes in mitochondrial complex I deficiency. Am J Hum Genet 2001 Jun;**68**(6):1344-52.

- (3) Bugiani M, Invernizzi F, Alberio S, Briem E, Lamantea E, Carrara F, Moroni I, Farina L, Spada M, Donati MA, Uziel G, Zeviani M. Clinical and molecular findings in children with complex I deficiency. *Biochim Biophys Acta* 2004 Dec 6;**1659**(2-3):136-47.
- (4) Laugel V, This-Bernd V, Cormier-Daire V, Speeg-Schatz C, de Saint-Martin A, Fischbach M. Early-onset ophthalmoplegia in Leigh-like syndrome due to NDUFV1 mutations. *Pediatr Neurol* 2007 Jan;**36**(1):54-7.
- (5) Zafeiriou DI, Rodenburg RJ, Scheffer H, van den Heuvel LP, Pouwels PJ, Ververi A, Athanasiadou-Piperopoulou F, van der Knaap MS. MR spectroscopy and serial magnetic resonance imaging in a patient with mitochondrial cystic leukoencephalopathy due to complex I deficiency and NDUFV1 mutations and mild clinical course. *Neuropediatrics* 2008 Jun;**39**(3):172-5.
- (6) Breningstall GN, Shoffner J, Patterson RJ. Siblings with leukoencephalopathy. *Semin Pediatr Neurol* 2008 Dec;**15**(4):212-5.
- (7) Calvo SE, Tucker EJ, Compton AG, Kirby DM, Crawford G, Burt NP, Rivas M, Guiducci C, Bruno DL, Goldberger OA, Redman MC, Wiltshire E, Wilson CJ, Altshuler D, Gabriel SB, Daly MJ, Thorburn DR, Mootha VK. High-throughput, pooled sequencing identifies mutations in NUBPL and FOXRED1 in human complex I deficiency. *Nat Genet* 2010 Oct;**42**(10):851-8.
- (8) Vilain C, Rens C, Aeby A, Baleriaux D, Van BP, Remiche G, Smet J, Van CR, Abramowicz M, Pirson I. A novel NDUFV1 gene mutation in complex I deficiency in consanguineous siblings with brainstem lesions and Leigh syndrome. *Clin Genet* 2011 Jun 23.
- (9) Benit P, Beugnot R, Chretien D, Giurgea I, De Lonlay-Debeney P, Issartel JP, Corral-Debrinski M, Kerschler S, Rustin P, Rotig A, Munnich A. Mutant NDUFV2 subunit of mitochondrial complex I causes early onset hypertrophic cardiomyopathy and encephalopathy. *Hum Mutat* 2003 Jun;**21**(6):582-6.
- (10) Pagniez-Mammeri H, Lombes A, Brivet M, Ogier-de BH, Landrieu P, Legrand A, Slama A. Rapid screening for nuclear genes mutations in isolated respiratory chain complex I defects. *Mol Genet Metab* 2009 Apr;**96**(4):196-200.

- (11) Fernandez-Moreira D, Ugalde C, Smeets R, Rodenburg RJ, Lopez-Laso E, Ruiz-Falco ML, Briones P, Martin MA, Smeitink JA, Arenas J. X-linked NDUFA1 gene mutations associated with mitochondrial encephalomyopathy. *Ann Neurol* 2007 Jan;**61**(1):73-83.
- (12) Potluri P, Davila A, Ruiz-Pesini E, Mishmar D, O'Hearn S, Hancock S, Simon M, Scheffler IE, Wallace DC, Procaccio V. A novel NDUFA1 mutation leads to a progressive mitochondrial complex I-specific neurodegenerative disease. *Mol Genet Metab* 2009 Apr;**96**(4):189-95.
- (13) Mayr JA, Bodamer O, Haack TB, Zimmermann FA, Madignier F, Prokisch H, Rauscher C, Koch J, Sperl W. Heterozygous mutation in the X chromosomal NDUFA1 gene in a girl with complex I deficiency. *Mol Genet Metab* 2011 Aug;**103**(4):358-61.
- (14) Hoefs SJ, Dieteren CE, Distelmaier F, Janssen RJ, Epplen A, Swarts HG, Forkink M, Rodenburg RJ, Nijtmans LG, Willems PH, Smeitink JA, van den Heuvel LP. NDUFA2 complex I mutation leads to Leigh disease. *Am J Hum Genet* 2008 Jun;**82**(6):1306-15.
- (15) van den Bosch BJ, Gerards M, Sluiter W, Stegmann AP, Jongen EL, Hellebrekers DM, Oegema R, Lambrichts EH, Prokisch H, Danhauser K, Schoonderwoerd K, de Coo IF, Smeets HJ. Defective NDUFA9 as a novel cause of neonatally fatal complex I disease. *J Med Genet* 2012 Jan;**49**(1):10-5.
- (16) Hoefs SJ, van Spronsen FJ, Lenssen EW, Nijtmans LG, Rodenburg RJ, Smeitink JA, van den Heuvel LP. NDUFA10 mutations cause complex I deficiency in a patient with Leigh disease. *Eur J Hum Genet* 2011 Mar;**19**(3):270-4.
- (17) Haack TB, Haberberger B, Frisch EM, Wieland T, Iuso A, Gorza M, Strecker V, Graf E, Mayr JA, Herberg U, Hennermann JB, Klopstock T, Kuhn KA, Ahting U, Sperl W, Wilichowski E, Hoffmann GF, Tesarova M, Hansikova H, Zeman J, Plecko B, Zeviani M, Wittig I, Strom TM, Schuelke M, Freisinger P, Meitinger T, Prokisch H. Molecular diagnosis in mitochondrial complex I deficiency using exome sequencing. *J Med Genet* 2012 Apr;**49**(4):277-83.
- (18) Berger I, Hershkovitz E, Shaag A, Edvardson S, Saada A, Elpeleg O. Mitochondrial complex I deficiency caused by a deleterious NDUFA11 mutation. *Ann Neurol* 2008 Mar;**63**(3):405-8.

- (19) Ostergaard E, Rodenburg RJ, van den Brand M, Thomsen LL, Duno M, Batbayli M, Wibrand F, Nijtmans L. Respiratory chain complex I deficiency due to NDUFA12 mutations as a new cause of Leigh syndrome. *J Med Genet* 2011 Nov;**48**(11):737-40.
- (20) Calvo SE, Compton AG, Hershman SG, Lim SC, Lieber DS, Tucker EJ, Laskowski A, Garone C, Liu S, Jaffe DB, Christodoulou J, Fletcher JM, Bruno DL, Goldblatt J, DiMauro S, Thorburn DR, Mootha VK. Molecular diagnosis of infantile mitochondrial disease with targeted next-generation sequencing. *Sci Transl Med* 2012 Jan 25;**4**(118):118ra10.
- (21) Haack TB, Madignier F, Herzer M, Lamantea E, Danhauser K, Invernizzi F, Koch J, Freitag M, Drost R, Hillier I, Haberberger B, Mayr JA, Ahting U, Tiranti V, Rotig A, Iuso A, Horvath R, Tesarova M, Baric I, Uziel G, Rolinski B, Sperl W, Meitinger T, Zeviani M, Freisinger P, Prokisch H. Mutation screening of 75 candidate genes in 152 complex I deficiency cases identifies pathogenic variants in 16 genes including NDUF9. *J Med Genet* 2012 Feb;**49**(2):83-9.
- (22) Martin MA, Blazquez A, Gutierrez-Solana LG, Fernandez-Moreira D, Briones P, Andreu AL, Garesse R, Campos Y, Arenas J. Leigh syndrome associated with mitochondrial complex I deficiency due to a novel mutation in the NDUF1 gene. *Arch Neurol* 2005 Apr;**62**(4):659-61.
- (23) Hoefs SJ, Skjeldal OH, Rodenburg RJ, Nedregaard B, van Kaauwen EP, Spiekerkotter U, von Kleist-Retzow JC, Smeitink JA, Nijtmans LG, van den Heuvel LP. Novel mutations in the NDUF1 gene cause low residual activities in human complex I deficiencies. *Mol Genet Metab* 2010 Jul;**100**(3):251-6.
- (24) Tuppen HA, Hogan VE, He L, Blakely EL, Worgan L, Al-Dosary M, Saretzki G, Alston CL, Morris AA, Clarke M, Jones S, Devlin AM, Mansour S, Chrzanowska-Lightowlers ZM, Thorburn DR, McFarland R, Taylor RW. The p.M292T NDUF2 mutation causes complex I-deficient Leigh syndrome in multiple families. *Brain* 2010 Oct;**133**(10):2952-63.
- (25) Ferreira M, Torraco A, Rizza T, Fattori F, Meschini MC, Castana C, Go NE, Nargang FE, Duarte M, Piemonte F, Dionisi-Vici C, Videira A, Vilarinho L, Santorelli FM, Carozzo R, Bertini E. Progressive cavitating leukoencephalopathy associated with respiratory chain complex I deficiency and a novel mutation in NDUF1. *Neurogenetics* 2011 Feb;**12**(1):9-17.

- (26) Danhauser K, Iuso A, Haack TB, Freisinger P, Brockmann K, Mayr JA, Meitinger T, Prokisch H. Cellular rescue-assay aids verification of causative DNA-variants in mitochondrial complex I deficiency. *Mol Genet Metab* 2011 Jun;**103**(2):161-6.
- (27) Invernizzi F, D'Amato I, Jensen PB, Ravaglia S, Zeviani M, Tiranti V. Microscale oxygraphy reveals OXPHOS impairment in MRC mutant cells. *Mitochondrion* 2012 Mar;**12**(2):328-35.
- (28) Loeffen J, Elpeleg O, Smeitink J, Smeets R, Stockler-Ipsiroglu S, Mandel H, Sengers R, Trijbels F, van den Heuvel L. Mutations in the complex I NDUFS2 gene of patients with cardiomyopathy and encephalomyopathy. *Ann Neurol* 2001 Feb;**49**(2):195-201.
- (29) Benit P, Slama A, Cartault F, Giurgea I, Chretien D, Lebon S, Marsac C, Munnich A, Rotig A, Rustin P. Mutant NDUFS3 subunit of mitochondrial complex I causes Leigh syndrome. *J Med Genet* 2004 Jan;**41**(1):14-7.
- (30) van den Heuvel L, Ruitenbeek W, Smeets R, Gelman-Kohan Z, Elpeleg O, Loeffen J, Trijbels F, Mariman E, de BD, Smeitink J. Demonstration of a new pathogenic mutation in human complex I deficiency: a 5-bp duplication in the nuclear gene encoding the 18-kD (AQDQ) subunit. *Am J Hum Genet* 1998 Feb;**62**(2):262-8.
- (31) Budde SM, van den Heuvel LP, Janssen AJ, Smeets RJ, Buskens CA, DeMeirleir L, Van CR, Baethmann M, Voit T, Trijbels JM, Smeitink JA. Combined enzymatic complex I and III deficiency associated with mutations in the nuclear encoded NDUFS4 gene. *Biochem Biophys Res Commun* 2000 Aug 18;**275**(1):63-8.
- (32) Budde SM, van den Heuvel LP, Smeets RJ, Skladal D, Mayr JA, Boelen C, Petruzzella V, Papa S, Smeitink JA. Clinical heterogeneity in patients with mutations in the NDUFS4 gene of mitochondrial complex I. *J Inheret Metab Dis* 2003;**26**(8):813-5.
- (33) Lebre AS, Rio M, Faivre dL, Vernerey D, Landrieu P, Slama A, Jardel C, Laforet P, Rodriguez D, Dorison N, Galanaud D, Chabrol B, Paquis-Flucklinger V, Grevent D, Edvardson S, Steffann J, Funalot B, Villeneuve N, Valayannopoulos V, de LP, Desguerre I, Brunelle F, Bonnefont JP, Rotig A, Munnich A, Boddaert N. A common pattern of brain MRI imaging in mitochondrial diseases with complex I deficiency. *J Med Genet* 2011 Jan;**48**(1):16-23.

- (34) Petruzzella V, Vergari R, Puzifferri I, Boffoli D, Lamantea E, Zeviani M, Papa S. A nonsense mutation in the NDUFS4 gene encoding the 18 kDa (AQDQ) subunit of complex I abolishes assembly and activity of the complex in a patient with Leigh-like syndrome. *Hum Mol Genet* 2001 Mar 1;**10**(5):529-35.
- (35) Benit P, Steffann J, Lebon S, Chretien D, Kadhom N, de LP, Goldenberg A, Dumez Y, Dommergues M, Rustin P, Munnich A, Rotig A. Genotyping microsatellite DNA markers at putative disease loci in inbred/multiplex families with respiratory chain complex I deficiency allows rapid identification of a novel nonsense mutation (IVS1nt -1) in the NDUFS4 gene in Leigh syndrome. *Hum Genet* 2003 May;**112**(5-6):563-6.
- (36) Rotig A, Lebon S, Zinovieva E, Mollet J, Sarzi E, Bonnefont JP, Munnich A. Molecular diagnostics of mitochondrial disorders. *Biochim Biophys Acta* 2004 Dec 6;**1659**(2-3):129-35.
- (37) Assouline Z, Jambou M, Rio M, Bole-Feysot C, de LP, Barnerias C, Desguerre I, Bonnemains C, Guillermet C, Steffann J, Munnich A, Bonnefont JP, Rotig A, Lebre AS. A constant and similar assembly defect of mitochondrial respiratory chain complex I allows rapid identification of NDUFS4 mutations in patients with Leigh syndrome. *Biochim Biophys Acta* 2012 Jun;**1822**(6):1062-9.
- (38) Anderson SL, Chung WK, Frezzo J, Papp JC, Ekstein J, DiMauro S, Rubin BY. A novel mutation in NDUFS4 causes Leigh syndrome in an Ashkenazi Jewish family. *J Inherit Metab Dis* 2008 Dec;**31 Suppl 2**:S461-S467.
- (39) Leshinsky-Silver E, Lebre AS, Minai L, Saada A, Steffann J, Cohen S, Rotig A, Munnich A, Lev D, Lerman-Sagie T. NDUFS4 mutations cause Leigh syndrome with predominant brainstem involvement. *Mol Genet Metab* 2009 Jul;**97**(3):185-9.
- (40) Kirby DM, Salemi R, Sugiana C, Ohtake A, Parry L, Bell KM, Kirk EP, Boneh A, Taylor RW, Dahl HH, Ryan MT, Thorburn DR. NDUFS6 mutations are a novel cause of lethal neonatal mitochondrial complex I deficiency. *J Clin Invest* 2004 Sep;**114**(6):837-45.
- (41) Spiegel R, Shaag A, Mandel H, Reich D, Penyakov M, Hujeirat Y, Saada A, Elpeleg O, Shalev SA. Mutated NDUFS6 is the cause of fatal neonatal lactic acidemia in Caucasus Jews. *Eur J Hum Genet* 2009 Sep;**17**(9):1200-3.

- (42) Triepels R, Smeitink J, Loeffen J, Smeets R, Buskens C, Trijbels F, van den Heuvel L. The human nuclear-encoded acyl carrier subunit (NDUFAB1) of the mitochondrial complex I in human pathology. *J Inher Metab Dis* 1999 Apr;**22**(2):163-73.
- (43) Lebon S, Rodriguez D, Bridoux D, Zerrad A, Rotig A, Munnich A, Legrand A, Slama A. A novel mutation in the human complex I NDUF57 subunit associated with Leigh syndrome. *Mol Genet Metab* 2007 Apr;**90**(4):379-82.
- (44) Lebon S, Minai L, Chretien D, Corcos J, Serre V, Kadhom N, Steffann J, Pauchard JY, Munnich A, Bonnefont JP, Rotig A. A novel mutation of the NDUF57 gene leads to activation of a cryptic exon and impaired assembly of mitochondrial complex I in a patient with Leigh syndrome. *Mol Genet Metab* 2007 Sep;**92**(1-2):104-8.
- (45) Loeffen J, Smeitink J, Triepels R, Smeets R, Schuelke M, Sengers R, Trijbels F, Hamel B, Mullaart R, van den Heuvel L. The first nuclear-encoded complex I mutation in a patient with Leigh syndrome. *Am J Hum Genet* 1998 Dec;**63**(6):1598-608.
- (46) Procaccio V, Wallace DC. Late-onset Leigh syndrome in a patient with mitochondrial complex I NDUF58 mutations. *Neurology* 2004 May 25;**62**(10):1899-901.
- (47) Dunning CJ, McKenzie M, Sugiana C, Lazarou M, Silke J, Connelly A, Fletcher JM, Kirby DM, Thorburn DR, Ryan MT. Human CIA30 is involved in the early assembly of mitochondrial complex I and mutations in its gene cause disease. *EMBO J* 2007 Jul 11;**26**(13):3227-37.
- (48) Fassone E, Taanman JW, Hargreaves IP, Sebire NJ, Cleary MA, Burch M, Rahman S. Mutations in the mitochondrial complex I assembly factor NDUF4F1 cause fatal infantile hypertrophic cardiomyopathy. *J Med Genet* 2011 Oct;**48**(10):691-7.
- (49) Ogilvie I, Kennaway NG, Shoubridge EA. A molecular chaperone for mitochondrial complex I assembly is mutated in a progressive encephalopathy. *J Clin Invest* 2005 Oct;**115**(10):2784-92.
- (50) Barghuti F, Elian K, Gomori JM, Shaag A, Edvardson S, Saada A, Elpeleg O. The unique neuroradiology of complex I deficiency due to NDUF4A12L defect. *Mol Genet Metab* 2008 May;**94**(1):78-82.

- (51) Hoefs SJ, Dieteren CE, Rodenburg RJ, Naess K, Bruhn H, Wibom R, Wagena E, Willems PH, Smeitink JA, Nijtmans LG, van den Heuvel LP. Baculovirus complementation restores a novel NDUFAF2 mutation causing complex I deficiency. *Hum Mutat* 2009 Jul;**30**(7):E728-E736.
- (52) Janssen RJ, Distelmaier F, Smeets R, Wijnhoven T, Ostergaard E, Jaspers NG, Raams A, Kemp S, Rodenburg RJ, Willems PH, van den Heuvel LP, Smeitink JA, Nijtmans LG. Contiguous gene deletion of ELOVL7, ERCC8 and NDUFAF2 in a patient with a fatal multisystem disorder. *Hum Mol Genet* 2009 Sep 15;**18**(18):3365-74.
- (53) Herzer M, Koch J, Prokisch H, Rodenburg R, Rauscher C, Radauer W, Forstner R, Pilz P, Rolinski B, Freisinger P, Mayr JA, Sperl W. Leigh disease with brainstem involvement in complex I deficiency due to assembly factor NDUFAF2 defect. *Neuropediatrics* 2010 Feb;**41**(1):30-4.
- (54) Saada A, Vogel RO, Hoefs SJ, van den Brand MA, Wessels HJ, Willems PH, Venselaar H, Shaag A, Barghuti F, Reish O, Shohat M, Huynen MA, Smeitink JA, van den Heuvel LP, Nijtmans LG. Mutations in NDUFAF3 (C3ORF60), encoding an NDUFAF4 (C6ORF66)-interacting complex I assembly protein, cause fatal neonatal mitochondrial disease. *Am J Hum Genet* 2009 Jun;**84**(6):718-27.
- (55) Saada A, Edvardson S, Rapoport M, Shaag A, Amry K, Miller C, Lorberboum-Galski H, Elpeleg O. C6ORF66 is an assembly factor of mitochondrial complex I. *Am J Hum Genet* 2008 Jan;**82**(1):32-8.
- (56) Pagliarini DJ, Calvo SE, Chang B, Sheth SA, Vafai SB, Ong SE, Walford GA, Sugiana C, Boneh A, Chen WK, Hill DE, Vidal M, Evans JG, Thorburn DR, Carr SA, Mootha VK. A mitochondrial protein compendium elucidates complex I disease biology. *Cell* 2008 Jul 11;**134**(1):112-23.
- (57) McKenzie M, Tucker EJ, Compton AG, Lazarou M, George C, Thorburn DR, Ryan MT. Mutations in the gene encoding C8orf38 block complex I assembly by inhibiting production of the mitochondria-encoded subunit ND1. *J Mol Biol* 2011 Dec 2;**414**(3):413-26.
- (58) Sugiana C, Pagliarini DJ, McKenzie M, Kirby DM, Salemi R, bu-Amero KK, Dahl HH, Hutchison WM, Vascotto KA, Smith SM, Newbold RF, Christodoulou J, Calvo S, Mootha VK, Ryan MT, Thorburn DR. Mutation of C20orf7 disrupts complex I assembly and causes lethal neonatal mitochondrial disease. *Am J Hum Genet* 2008 Oct;**83**(4):468-78.

- (59) Gerards M, Sluiter W, van den Bosch BJ, de WE, Calis CM, Frentzen M, Akbari H, Schoonderwoerd K, Scholte HR, Jongbloed RJ, Hendrickx AT, de C, I, Smeets HJ. Defective complex I assembly due to C20orf7 mutations as a new cause of Leigh syndrome. *J Med Genet* 2009 Jun 18.
- (60) Saada A, Edvardson S, Shaag A, Chung WK, Segel R, Miller C, Jalas C, Elpeleg O. Combined OXPHOS complex I and IV defect, due to mutated complex I assembly factor C20ORF7. *J Inherit Metab Dis* 2011 May 24.
- (61) Fassone E, Duncan AJ, Taanman JW, Pagnamenta AT, Sadowski MI, Holand T, Qasim W, Rutland P, Calvo SE, Mootha VK, Bitner-Glindzicz M, Rahman S. FOXRED1, encoding an FAD-dependent oxidoreductase complex-I-specific molecular chaperone, is mutated in infantile-onset mitochondrial encephalopathy. *Hum Mol Genet* 2010 Dec 15;**19**(24):4837-47.
- (62) Nouws J, Nijtmans L, Houten SM, van den Brand M, Huynen M, Venselaar H, Hoefs S, Gloerich J, Kronick J, Hutchin T, Willems P, Rodenburg R, Wanders R, van den Heuvel L, Smeitink J, Vogel RO. Acyl-CoA dehydrogenase 9 is required for the biogenesis of oxidative phosphorylation complex I. *Cell Metab* 2010 Sep 8;**12**(3):283-94.
- (63) Haack TB, Danhauser K, Haberberger B, Hoser J, Strecker V, Boehm D, Uziel G, Lamantea E, Invernizzi F, Poulton J, Rolinski B, Iuso A, Biskup S, Schmidt T, Mewes HW, Wittig I, Meitinger T, Zeviani M, Prokisch H. Exome sequencing identifies ACAD9 mutations as a cause of complex I deficiency. *Nat Genet* 2010 Dec;**42**(12):1131-4.
- (64) Gerards M, van den Bosch BJ, Danhauser K, Serre V, van WM, Wanders RJ, Nicolaes GA, Sluiter W, Schoonderwoerd K, Scholte HR, Prokisch H, Rotig A, de Coo IF, Smeets HJ. Riboflavin-responsive oxidative phosphorylation complex I deficiency caused by defective ACAD9: new function for an old gene. *Brain* 2011 Jan;**134**(Pt 1):210-9.
- (65) Scholte HR, Busch HF, Bakker HD, Bogaard JM, Luyt-Houwen IE, Kuyt LP. Riboflavin-responsive complex I deficiency. *Biochim Biophys Acta* 1995 May 24;**1271**(1):75-83.
